# Supplementary material for: Vascular tone and angiogenesis modulation by catecholamine coordinated to ruthenium
Source: Royal Society of Chemistry journal article supplement (doi:10.1039/c9md00573k), 2020-01-01
Supplement: c9md00573k1.pdf [file c9md00573k1.pdf]

## Vascular tone and angiogenesis modulation by catecholamine coordinated to ruthenium

Jacqueline Querino Alves<sup>a</sup>, Laena Pernomian<sup>b,\*</sup>, Cássia Dias Silva<sup>a</sup>, Mayara Santos Gomes<sup>b</sup>, Ana Maria de Oliveira<sup>b</sup>, Roberto Santana da Silva<sup>a,b</sup>

**The precursor  $[\text{RuCl}(\text{NH}_3)_5]\text{Cl}$ , Catechol or Ruthenium-Catechol did not induced vascular contraction on rat aorta**

To evaluate the possibility of the vascular contraction induced by such ruthenium-catecholamine complex were not due to Ruthenium, free Catechol or Ru-Catechol it was performed cumulative concentration-effect curves to these precursors' compounds (Fig 5). So, it was not observed any contraction in intact or denuded rat aortas induced by the precursor  $[\text{RuCl}(\text{NH}_3)_5]\text{Cl}$ , Catechol or Ru-Catechol.

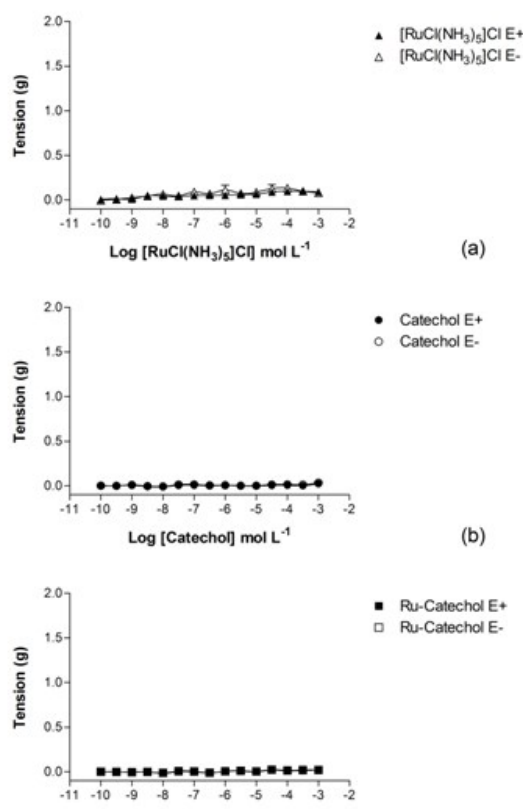

**Fig1** The precursor  $[\text{RuCl}(\text{NH}_3)_5]\text{Cl}$ , Catechol or Ru-Catechol did not induced contraction in rat aortas. Cumulative concentration-effect curves to the precursor  $[\text{RuCl}(\text{NH}_3)_5]\text{Cl}$ , (a), Catechol (b) or Ru-Catechol (c) was performed on intact (E+) or denuded (E-) rat aorta. Data were present as mean  $\pm$  S.E.M. ( $P > 0.05$ ),  $n = 4$  from independent experiments.

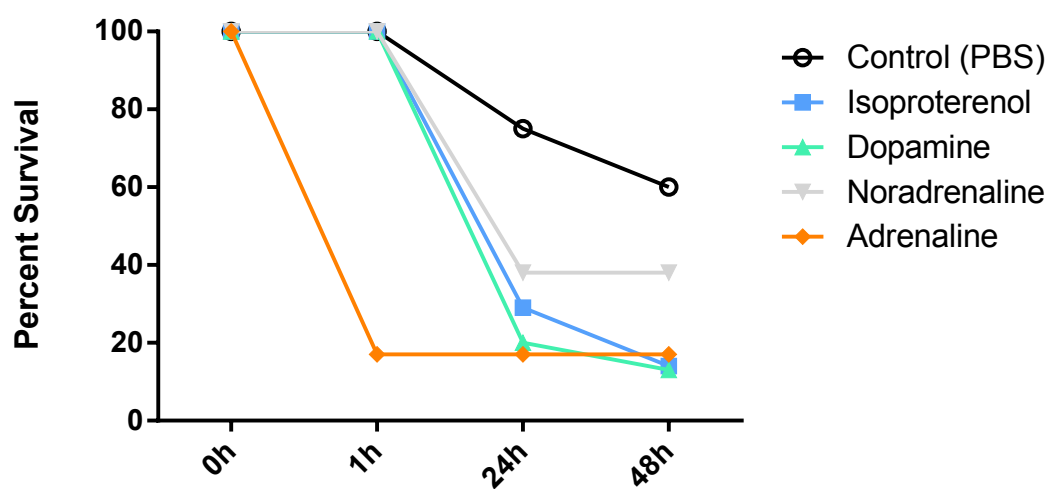

(a)

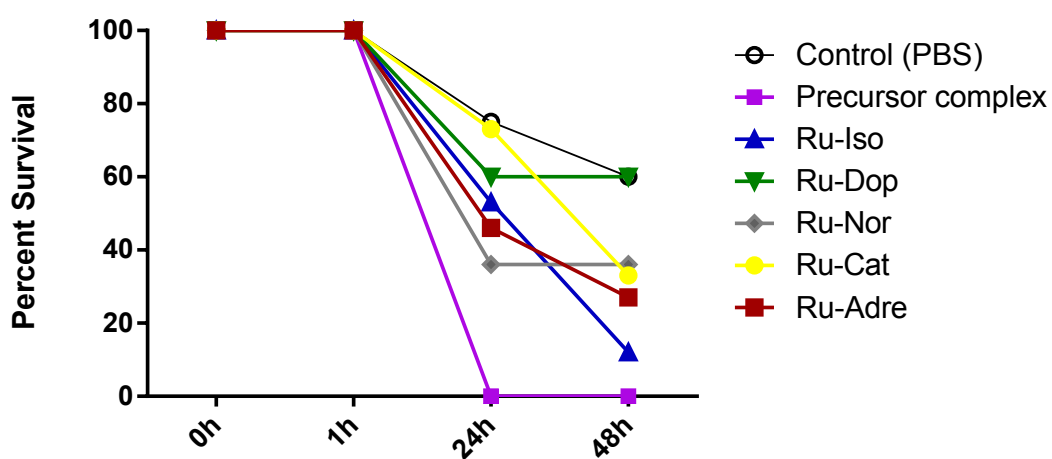

(b)

Fig2: Embryo survival curves for CAM assays: for free ligands (a); and metal complexes (b).  $n \geq 3$
